# Supplementary material
Source: publisher site journal article supplement (https://www.dovepress.com/article/supplementary_file/606757/606757%20Revised%20%2509Appendix%201.docx)
Supplement: Supplementary file 1 [file 606757%20Revised%20%2509Appendix%201.docx]

**Appendix 1**

**Box** 1: Autonomy versus Safety

*“I walk alone at home. I don’t want assistance to go to the toilet.”- Patient 3
“I don’t like bothering nurses. If I feel okay, I’ll go on my own.” -Patient 5
“Sometimes they say ‘wait', but I feel fine, and I go. Then I feel dizzy.”-Patient 2*

*“I don’t like asking for help unless I really need to. I feel embarrassed.”-Patient 4*

*“I had surgery, but I didn’t want to call. I walked and felt dizzy.”- Patient 8
“I want to go by myself. It’s not always possible to wait for someone.”- Patient 7*

*“I am not used to using a bell. At home, I walk on my own… I didn’t want to disturb the nurses.” - Patient 5*

*“Even though you will explain everything to them… they will just do their thing, despite the education and precautions.”* - Nurse, Medical Ward

*“They tell you, ‘I don’t need help, I can walk at home,’ but they are post-op and on pain meds.”* -Nurse, Medical Ward

*“Especially our local patients, they value privacy… They’ll insist on going alone.”* - Nurse Manager

*“Cultural factors affect everything. Some patients won’t accept help from male staff even if it’s critical to their safety.” - Assistant Director of Nursing*

**Box 2**: Gaps in Patient Education and Engagement

*“No one gave me any leaflet or video… I just thought not falling was common sense.”* - Patient 1

*“They told me not to walk alone but didn’t explain why or what to do instead.”* - Patient 1

*“No one showed me anything about falling. I was only told not to get up alone after surgery.”* -Patient 5
*“I was not given a paper or anything. Maybe they told me, but I don’t remember.”* - Patient 4

*“No one gave me a leaflet or showed me a video. They just said, 'Be careful. ’”* - Patient 4
*“I signed a paper but didn’t understand what it was.”* - Patient 6

*“Communication must be continuous… every period they come to remind him.”*- patient relative.

*“We make them sign the fall contract, but I’m not sure if they understand it.* - Nurse Manager

*“We have a fall contract, but how many patients can actually read and understand it?”* - Allied Health Professional

“*Some nurses explain everything clearly, others are rushed. It depends on who’s on duty.”*- Unit manager
*“They need reminders in their language, not just paperwork.”* - Physiotherapist

*“Many of our patients are Arabic-speaking, and if the nurse isn’t, they just give instructions and leave—it’s not real communication.”- Nurse Manager*

**Box 3a**: Environmental factors

*“The floor was wet near the sink. I slipped but didn’t fall that time.”* - Patient 5

*“I fell at night. It was dark, and I couldn’t find the bell.”* - Patient 1
*“The toilet is far, and there’s nothing to hold on to.”* - Patient 7

*“No railings in the room. Nothing to grab.”* - Patient 3

*“Most of the falls are related to toileting, especially at night*.”- Nurse, Medical ward

*“Toileting is one of the highest-risk activities, especially when patients are weak or confused.”* – Senior Nurse Leader

*“In the hospital, someone will come if something happens. At home, nobody knows.”-Patient 5*

*“Hospitals are a million times better than home. At home, there is no one watching you.”-Patient 7*
*“Everyone wears a yellow band; it doesn’t help us know who actually needs supervision.” – Nurse*

*“We give them non-slip socks, but some of them take them off or wear their own slippers, which are not safe.”- Nurse Assistant*

*“Rooms are small and often cluttered. If the patient uses a walker, there’s no space to move safely.” –* Wound Care Nurse

*“I’ve seen patients slip near the sink or bathroom. Sometimes there are no wet floor signs, or the cleaner has just mopped.”* – Duty Manager

**Box 3b**: Delayed Response to Call Bells and Staffing Constraints

*“When you get out of bed… You want the bell.” – Patient 7*

*“This bell… You call the nurse with… helps a lot.” - Patient 8*

*“I tried to call for help, but no one came for 10 minutes.”* - Patient 6

*“Sometimes I press the call bell, but no one comes, so I try to go alone.”* - Patient 02

*“We use WhatsApp to alert each other if someone is high risk, but unless it's documented in the handover or whiteboard, it may be missed.”- Head Nurse*

*“Call bell delays were a major factor in our past falls.”* - Nurse Manager
*“The patient fell while trying to reach the toilet on his own—he had pressed the bell, but we*

*were short-staffed that night.”* - Nurse, ICU

*“At night, there are fewer staff, and if one is busy with a critical patient, others don’t get checked. That’s when most of the falls happen.”*- Staff Nurse

*“We try to monitor all high-risk patients, but during high-acuity periods or shortages, it’s not always possible.”* – Fall champion Nurse

*“You need someone to sit with the patient, but honestly, we don’t have enough staff for that.”* — Allied Health Professional
*“Housekeeping staff help too — they alert us if they see anything risky, which is really helpful.”* — Nurse, Medical Ward

**Box 3c**: Limitations in Risk Assessment

*“We use the Morse Scale, but for patients coming from the Operating Room or under sedation, it doesn't capture the real risk. They may score low but still fall.”*- Clinical educator

*“It (Morse Scale) doesn’t factor in post-op confusion or medication side effects, which are very common here.”*- Senior Unit Manager

*“We transfer patients from the ICU to the ward, but the reassessment doesn’t always happen immediately. They’re still weak or confused.” –* Nurse Manager, Critical Care

*“There should be a protocol for fall risk reassessment after every transfer. Especially ICU to ward—it’s a vulnerable time.”* – Quality and Risk Officer

*“The fall scale we use doesn’t reflect Parkinson’s risk or balance issues clearly. They look okay in the bed, but when they stand up, it’s another story.”*- Physiotherapist

*“Confused patients often score borderline, but we know they’re high risk. Especially with delirium or after sedation.*”- Senior Nurse

*“I couldn’t sleep for two nights. I was exhausted and got dizzy in the morning.”* - Patient 8
*“Sometimes I wake up and don’t know where I am. That’s when I fall.”* - Patient 1

*“I couldn’t sleep properly at night. Too much light, noise… I was tired all day, and I fell once when trying to go toilet in the morning.”* - Patient 4

*“I didn’t feel like eating after surgery… felt lightheaded when I stood up.”* - Patient 5

*“After surgery, I didn’t eat for two days. I felt weak getting up.”* - Patient 2
*“Patients who are confused at night are the ones who fall most.”* - ICU Nurse

*“Delirium is common, especially in elderly post-op.”* - ICU Nurse
*“Nutrition and hydration should be part of fall risk, but they aren’t in our current assessment tools.”* – Dietician

**Box 4**: Opportunities for Innovation and Patient Centered Solutions

*“It would be ideal to have someone dedicated just to fall prevention, educating, rounding, talking to families… but who has time?”* - Nurse Manager

*“If they created an app that alerted us when a high-risk patient tried to get up, that would be amazing.”* – Physiotherapist

*“We need someone dedicated, like a falls coordinator, to track and educate.”* - Nurse Manager
*“A smarter system that updates fall risk in real time would be ideal.”* - Quality Nurse

*“Technology can help: sensor mats, voice alerts, live dashboards.” - Allied Health*

*“If there was something that reminded me or told me when I could walk, maybe that would help.”* - Patient 4
*“Even a small video in Arabic would help. I don’t understand the English papers they give.”* -Patient 5

*“If the bell alerted someone faster, I wouldn’t need to try on my own.”* - Patient 4
*“More rails, more light, and something that tells me when to move or not. Maybe a sensor?”* - Patient 8
